# Supplementary material for: Insights into the thermal and chemical stability of multilayered V2CTx MXene
Source: Royal Society of Chemistry journal article supplement (doi:10.1039/c9nr03020d), 2019-01-01
Supplement: c9nr03020d1.pdf [file c9nr03020d1.pdf]

## Supporting Information

### **Insights into the Thermal and Chemical Stability of Multilayered V<sub>2</sub>CT<sub>x</sub> MXene Under Different Environments**

Raj Thakur †, Armin Vahid Mohammadi ‡, Jorge Moncada †, Reid Adams †, Mingyang Chi †, Bruce Tatarchuk †, Majid Beidaghi ‡\*, Carlos A. Carrero †\*

† Department of Chemical Engineering, Auburn University, Auburn, Alabama 36830, United States

‡ Department of Material Engineering, Auburn University, Auburn, Alabama 36830, United States

Email-

\* Carlos A. Carrero: cac0134@auburn.edu

\* Majid Beidaghi: mzb0088@auburn.edu

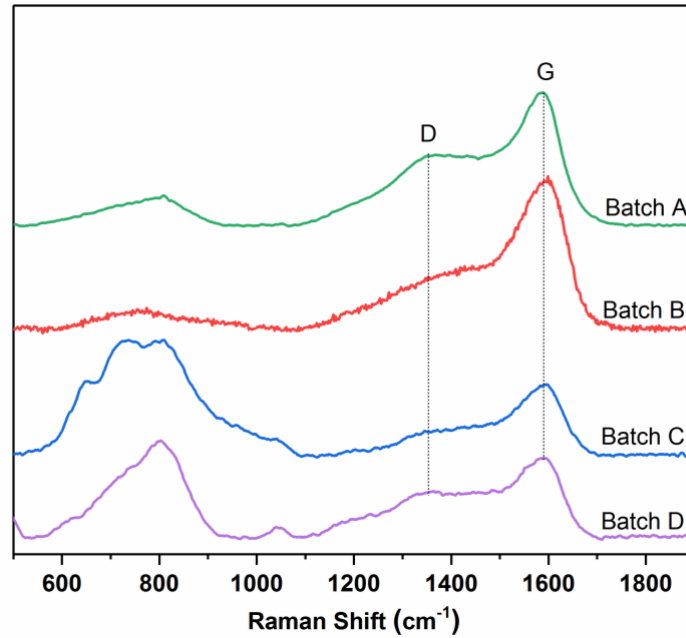

**Figure S1.** Raman spectra for various batches of  $V_2CT_x$  MXene showing different amount of carbon on the surface. For present study, batch D was selected.

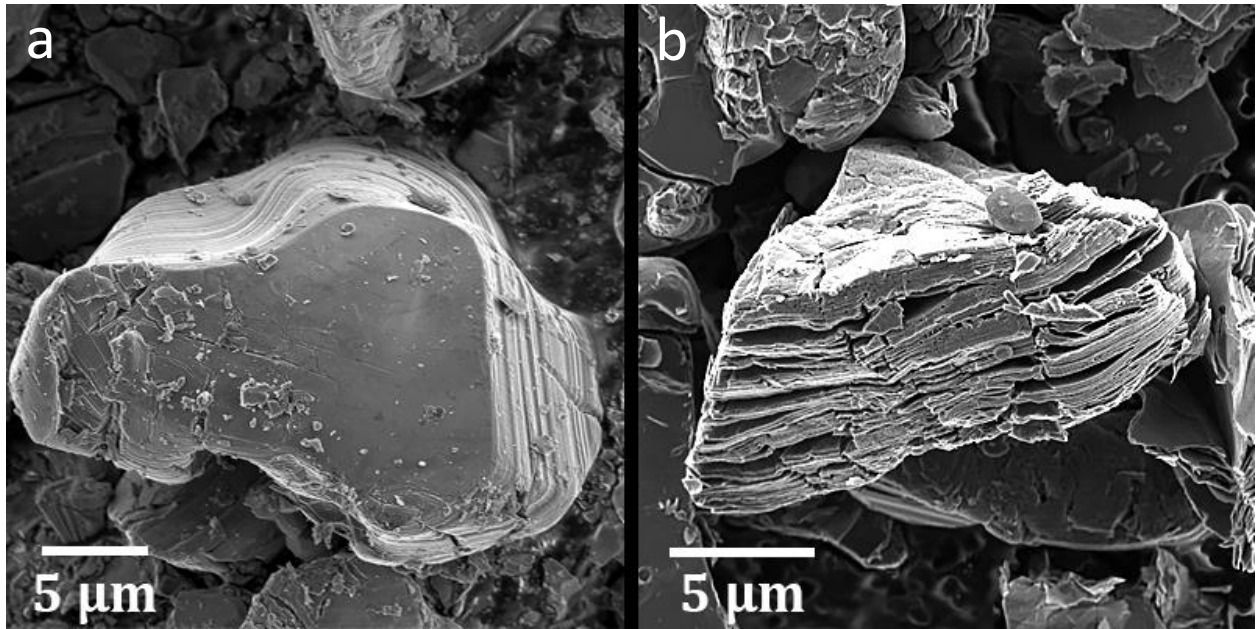

**Figure S2.** SEM image of (a)  $V_2AlC$  MAX phase and (b)  $V_2CT_x$  MXene phase.

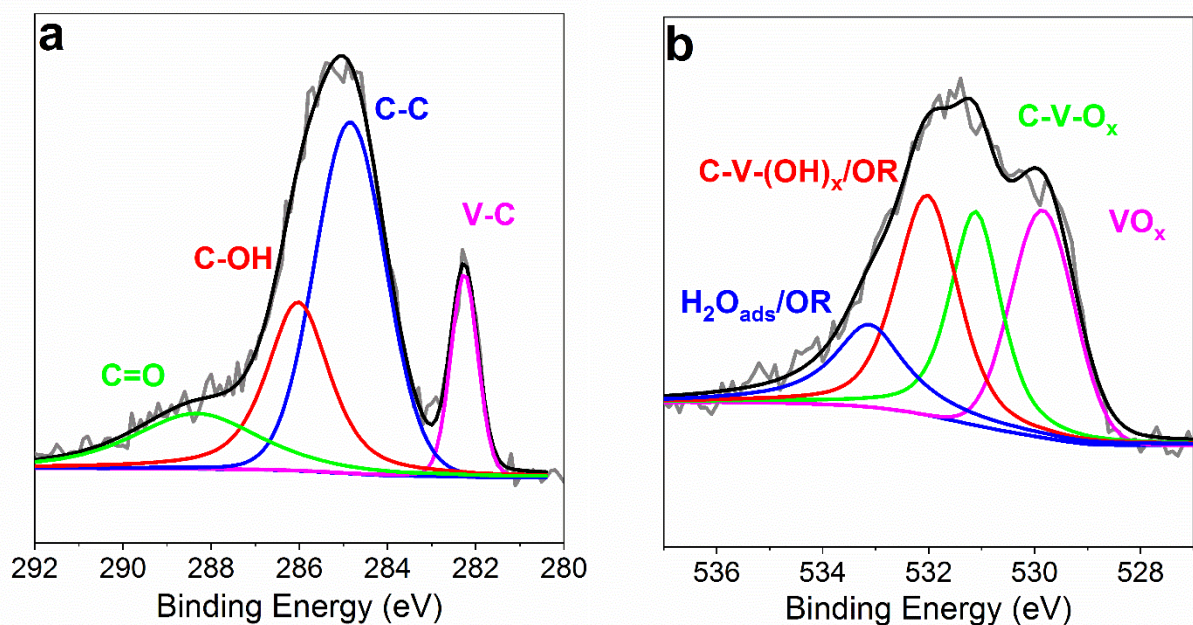

**Figure S3.** XPS spectra of (a) C1s region and (b) O1s region for the bare  $V_2CT_x$  MXene. Surface charging were corrected using the C1s level at 284.8 eV. OR stands for organic compounds due to atmospheric surface contaminations.<sup>1-4</sup>

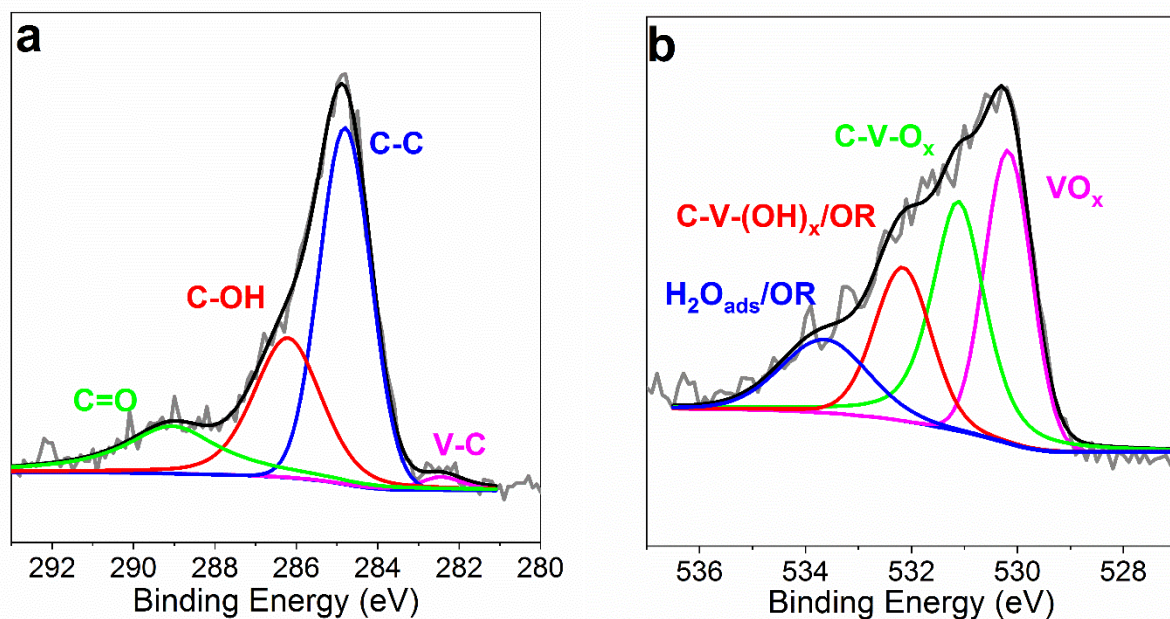

**Figure S4.** XPS spectra of (a) C1s region and (b) O1s region for the  $V_2CT_x$  MXene treated under nitrogen at 600°C. Surface charging were corrected using the C1s level at 284.8 eV. OR stands for organic compounds due to atmospheric surface contaminations.<sup>1-4</sup>

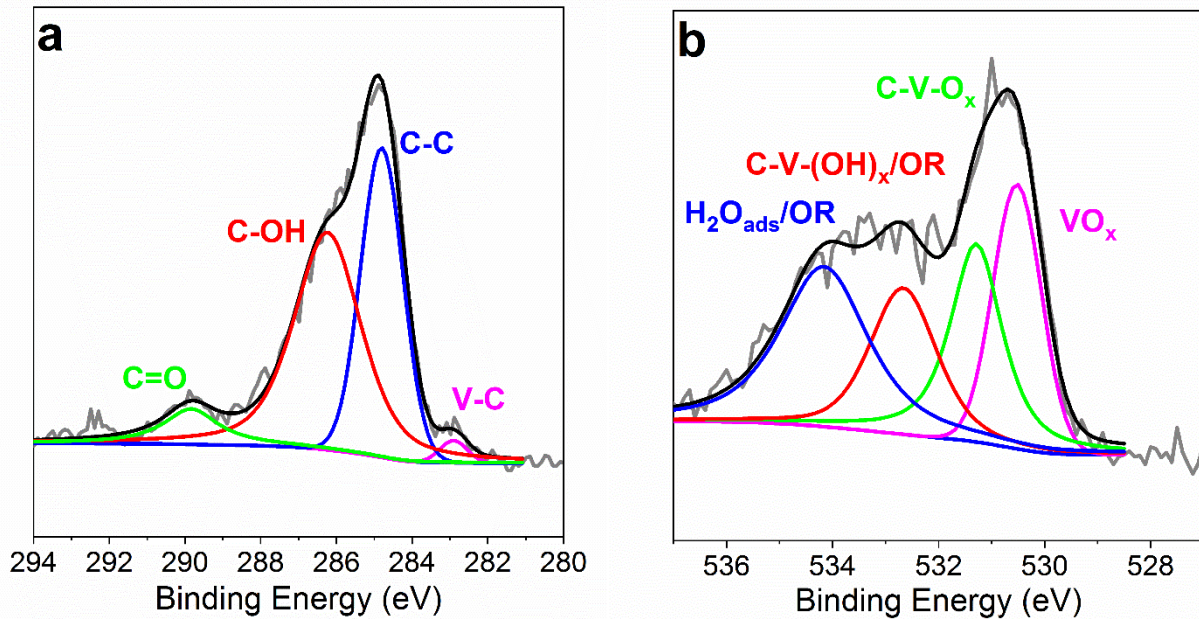

**Figure S5.** XPS spectra of (a) C1s region and (b) O1s region for the  $V_2CT_x$  MXene treated under Carbon dioxide at  $600^\circ\text{C}$ . Surface charging were corrected using the C1s level at 284.8 eV. OR stands for organic compounds due to atmospheric surface contaminations. <sup>1-4</sup>

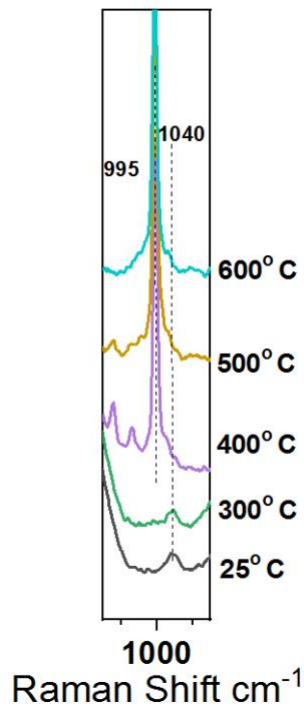

**Figure S6.** In situ Raman spectra of air treated  $V_2CT_x$  MXene. Surface V=O (vanadyl) shift to  $995\text{ cm}^{-1}$  from  $1040\text{ cm}^{-1}$  as a function of temperature.

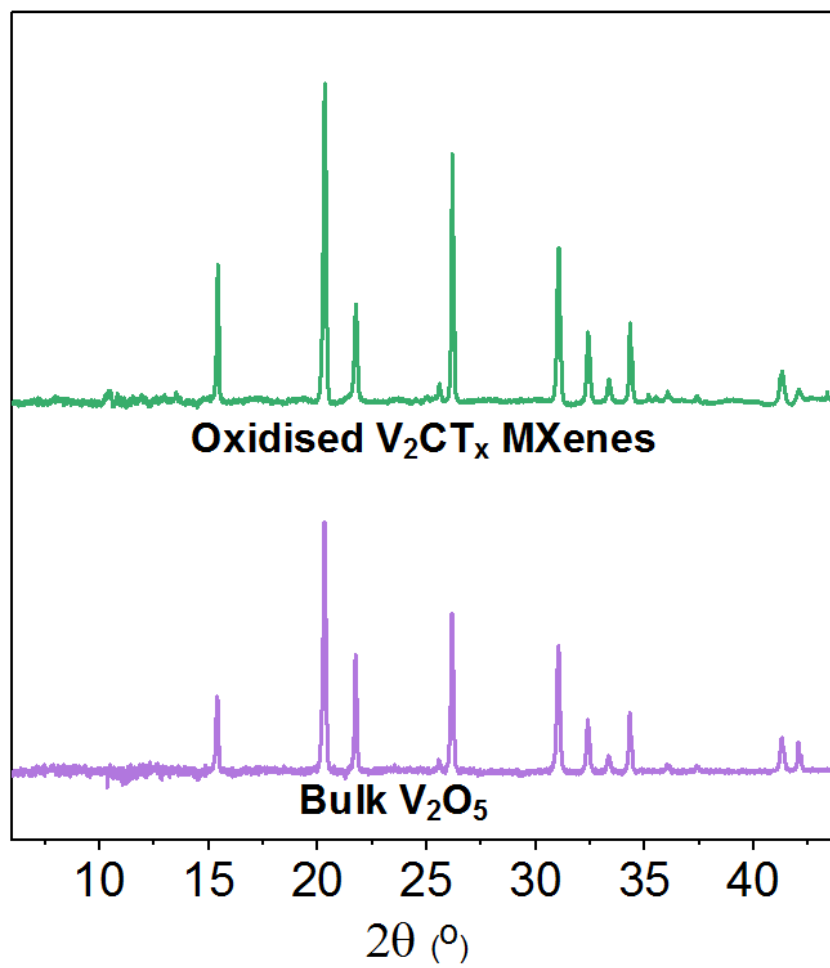

**Figure S7.** XRD diffractogram of commercial bulk V<sub>2</sub>O<sub>5</sub><sup>5</sup> and V<sub>2</sub>CT<sub>x</sub> MXene after treating under air.<sup>6</sup> (JCPDS No. 41-1426).

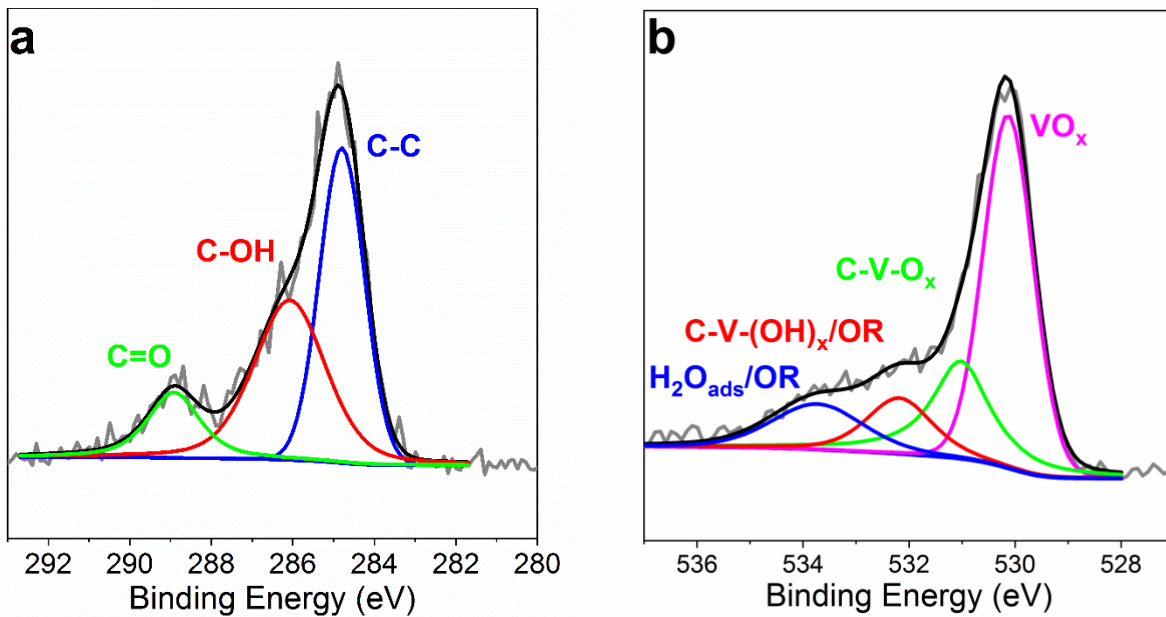

**Figure S8.** XPS spectra of (a) C1s region and (b) O1s region for the V<sub>2</sub>CT<sub>x</sub> MXene treated under air at 600°C. Surface charging were corrected using the C1s level at 284.8 eV. OR stands for organic compounds due to atmospheric surface contaminations.<sup>1-4</sup>

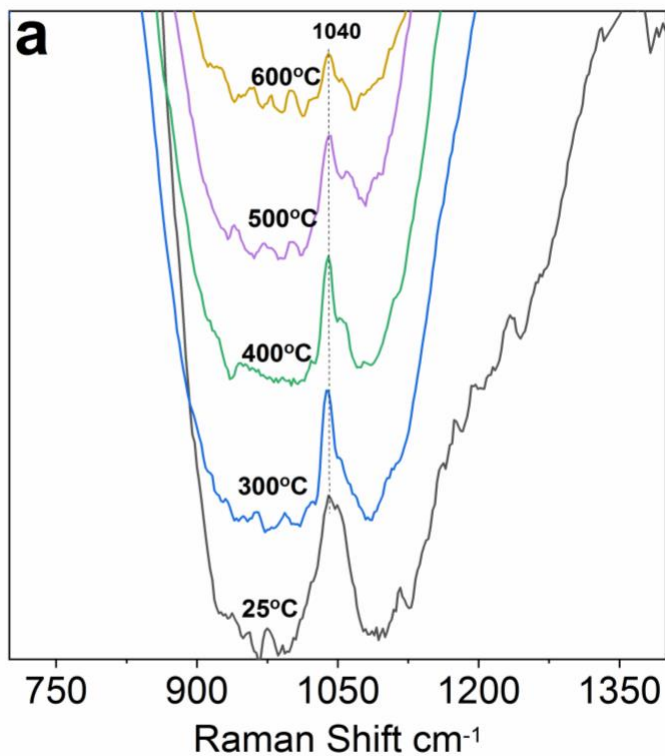

**Figure S9.** In situ Raman spectra of hydrogen treated V<sub>2</sub>CT<sub>x</sub> MXene. Surface V=O (vanadyl) as a function of temperature under H<sub>2</sub> environment.

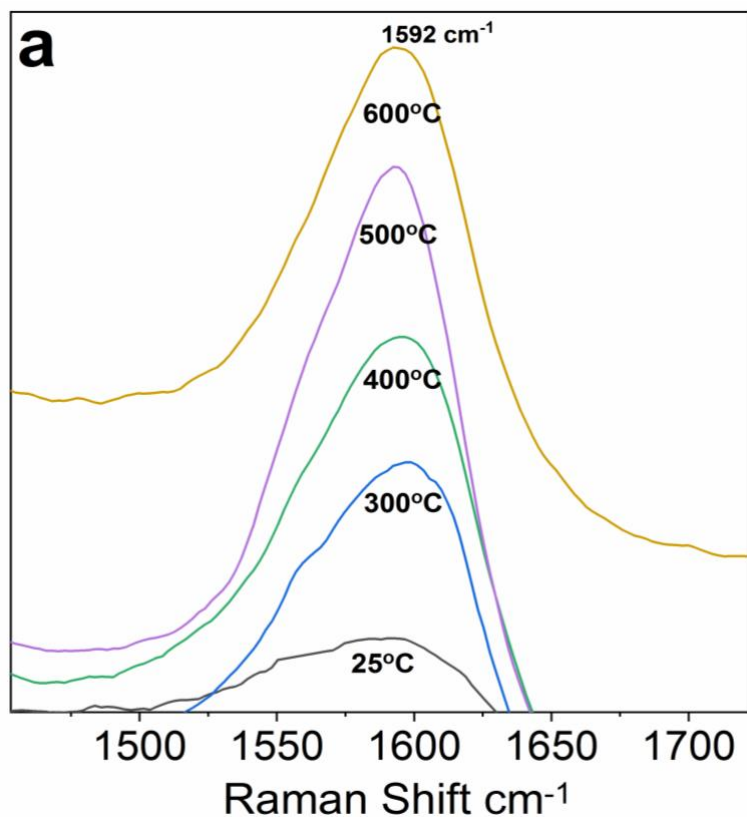

**Figure S10.** In situ Raman spectra of hydrogen treated  $V_2CT_x$  MXene. G carbon signals increase as a function of temperature under  $H_2$  environment.

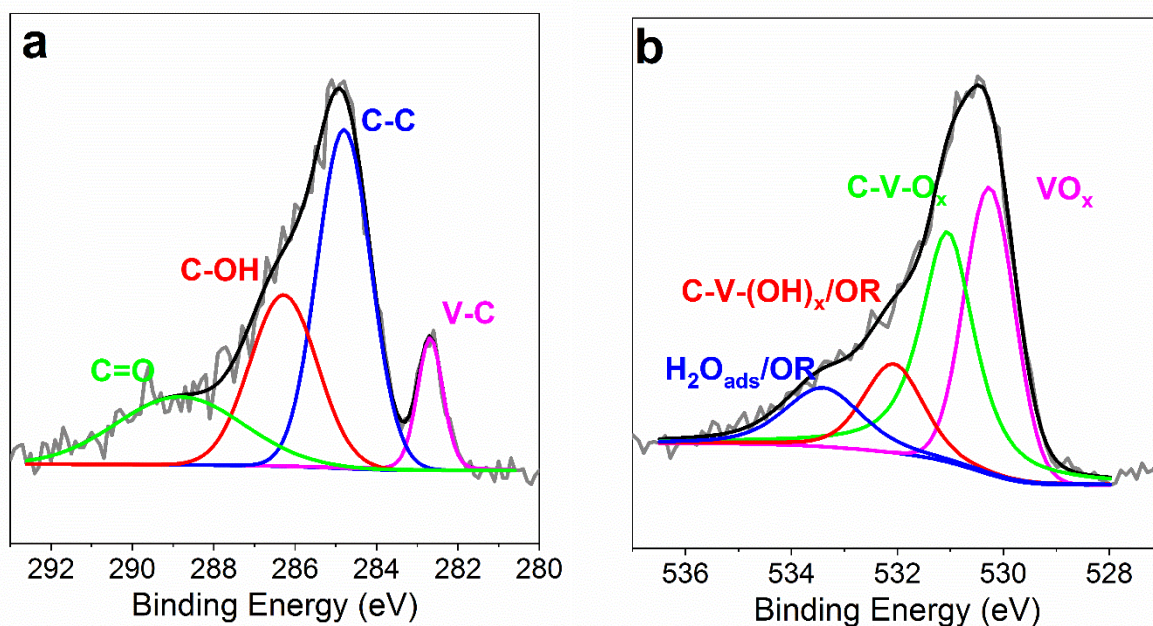

**Figure S11.** XPS spectra of (a) C1s region and (b) O1s region for the  $V_2CT_x$  MXene treated under hydrogen at 600°C. Surface charging were corrected using the C1s level at 284.8 eV. OR stands for organic compounds due to atmospheric surface contaminations.<sup>1-4</sup>

## References:

1. Didziulis, S. V.; Frantz, P.; Perry, S. S.; El-bjeirami, O.; Imaduddin, S.; Merrill, P. B., Substrate-dependent reactivity of water on metal carbide surfaces. *The Journal of Physical Chemistry B* **1999**, *103* (50), 11129-11140.
2. Jayaweera, P.; Quah, E.; Idriss, H., Photoreaction of ethanol on TiO<sub>2</sub> (110) single-crystal surface. *The Journal of Physical Chemistry C* **2007**, *111* (4), 1764-1769.
3. Beamson, G.; Briggs, D., High resolution monochromated X-ray photoelectron spectroscopy of organic polymers: A comparison between solid state data for organic polymers and gas phase data for small molecules. *Molecular Physics* **1992**, *76* (4), 919-936.
4. Choi, J.-G., The surface properties of vanadium compounds by X-ray photoelectron spectroscopy. *Applied surface science* **1999**, *148* (1-2), 64-72.
5. Fu, H.; Yang, X.; An, X.; Fan, W.; Jiang, X.; Yu, A., Experimental and theoretical studies of V<sub>2</sub>O<sub>5</sub>@TiO<sub>2</sub> core-shell hybrid composites with high gas sensing performance towards ammonia. *Sensors and Actuators B: Chemical* **2017**, *252*, 103-115.
6. Wu, M.; Wang, B.; Hu, Q.; Wang, L.; Zhou, A., The Synthesis Process and Thermal Stability of V<sub>2</sub>C MXene. *Materials* **2018**, *11* (11), 2112.
